# Supplementary material
Source: PubMed Central journal article supplement (PMC9848452)
Supplement: mmc1.pdf [file mmc1.pdf]

**Cell, Volume 186**

**Supplemental information**

**Alarming antibody evasion properties of rising**

**SARS-CoV-2 BQ and XBB subvariants**

**Qian Wang, Sho Iketani, Zhiteng Li, Liyuan Liu, Yicheng Guo, Yiming Huang, Anthony D. Bowen, Michael Liu, Maple Wang, Jian Yu, Riccardo Valdez, Adam S. Luring, Zizhang Sheng, Harris H. Wang, Aubree Gordon, Lihong Liu, and David D. Ho**

Table S1

| Sample ID             | Vaccine type and infected strain                | Days post-vaccination or *infection | Documented COVID-19 | Age | Gender |
|-----------------------|-------------------------------------------------|-------------------------------------|---------------------|-----|--------|
| 3 shots WT            |                                                 |                                     |                     |     |        |
| Q1                    | mRNA-1273/mRNA-1273/mRNA-1273                   | 29                                  | No                  | 66  | Female |
| Q2                    | BNT162b2/BNT162b2/BNT162b2                      | 30                                  | No                  | 68  | Male   |
| Q3                    | BNT162b2/BNT162b2/BNT162b2                      | 14                                  | No                  | 64  | Female |
| Q4                    | BNT162b2/BNT162b2/BNT162b2                      | 34                                  | No                  | 55  | Male   |
| Q5                    | BNT162b2/BNT162b2/BNT162b2                      | 34                                  | No                  | 45  | Male   |
| Q6                    | BNT162b2/BNT162b2/BNT162b2                      | 15                                  | No                  | 50  | Female |
| Q7                    | BNT162b2/BNT162b2/BNT162b2                      | 15                                  | No                  | 48  | Female |
| Q8                    | BNT162b2/BNT162b2/BNT162b2                      | 29                                  | No                  | 71  | Male   |
| Q9                    | BNT162b2/BNT162b2/BNT162b2                      | 90                                  | No                  | 59  | Male   |
| Q10                   | BNT162b2/BNT162b2/BNT162b2                      | 33                                  | No                  | 45  | Male   |
| Q11                   | BNT162b2/BNT162b2/BNT162b2                      | 87                                  | No                  | 66  | Female |
| Q12                   | BNT162b2/BNT162b2/BNT162b2                      | 84                                  | No                  | 26  | Male   |
| Q13                   | mRNA-1273/mRNA-1273/mRNA-1273                   | 23                                  | No                  | 28  | Female |
| Q15                   | BNT162b2/BNT162b2/mRNA-1273                     | 32                                  | No                  | 39  | Male   |
| 4 shots WT            |                                                 |                                     |                     |     |        |
| UM-65                 | BNT162b2/BNT162b2/BNT162b2/BNT162b2             | 24                                  | No                  | 52  | Female |
| UM-66                 | BNT162b2/BNT162b2/BNT162b2/BNT162b2             | 20                                  | No                  | 57  | Female |
| UM-67                 | BNT162b2/BNT162b2/BNT162b2/BNT162b2             | 20                                  | No                  | 61  | Female |
| UM-68                 | mRNA-1273/mRNA-1273/mRNA-1273/mRNA-1273         | 22                                  | No                  | 48  | Female |
| UM-69                 | BNT162b2/BNT162b2/BNT162b2/BNT162b2             | 23                                  | No                  | 50  | Female |
| UM-70                 | BNT162b2/BNT162b2/BNT162b2/BNT162b2             | 22                                  | No                  | 50  | Female |
| UM-71                 | BNT162b2/BNT162b2/BNT162b2/BNT162b2             | 20                                  | No                  | 58  | Female |
| UM-72                 | BNT162b2/BNT162b2/BNT162b2/BNT162b2             | 26                                  | No                  | 56  | Female |
| UM-73                 | BNT162b2/BNT162b2/BNT162b2/BNT162b2             | 29                                  | No                  | 63  | Female |
| UM-74                 | BNT162b2/BNT162b2/BNT162b2/BNT162b2             | 25                                  | No                  | 58  | Female |
| UM-75                 | BNT162b2/BNT162b2/BNT162b2/BNT162b2             | 21                                  | No                  | 62  | Male   |
| UM-76                 | BNT162b2/BNT162b2/BNT162b2/BNT162b2             | 26                                  | No                  | 54  | Female |
| UM-77                 | BNT162b2/BNT162b2/BNT162b2/BNT162b2             | 23                                  | No                  | 53  | Male   |
| UM-78                 | BNT162b2/BNT162b2/BNT162b2/BNT162b2             | 21                                  | No                  | 55  | Female |
| UM-79                 | BNT162b2/BNT162b2/BNT162b2/BNT162b2             | 23                                  | No                  | 59  | Female |
| UM-80                 | BNT162b2/BNT162b2/BNT162b2/BNT162b2             | 21                                  | No                  | 49  | Female |
| UM-81                 | BNT162b2/BNT162b2/BNT162b2/BNT162b2             | 27                                  | No                  | 57  | Female |
| UM-82                 | BNT162b2/BNT162b2/BNT162b2/BNT162b2             | 27                                  | No                  | 55  | Female |
| Q97                   | BNT162b2/BNT162b2/BNT162b2/BNT162b2             | 36                                  | No                  | 53  | Female |
| 3 shots WT + bivalent |                                                 |                                     |                     |     |        |
| UM-36                 | BNT162b2/BNT162b2/BNT162b2/Moderna Bivalent     | 24                                  | No                  | 38  | Female |
| UM-37                 | BNT162b2/BNT162b2/BNT162b2/Moderna Bivalent     | 27                                  | No                  | 42  | Female |
| UM-39                 | mRNA-1273//mRNA-1273/mRNA-1273/Moderna Bivalent | 24                                  | No                  | 36  | Male   |
| UM-40                 | BNT162b2/BNT162b2/BNT162b2/Pfizer Bivalent      | 25                                  | No                  | 37  | Female |
| UM-41                 | BNT162b2/BNT162b2/BNT162b2/Pfizer Bivalent      | 24                                  | No                  | 36  | Male   |
| UM-43                 | BNT162b2/BNT162b2/BNT162b2/Pfizer Bivalent      | 25                                  | No                  | 49  | Female |
| UM-44                 | BNT162b2/BNT162b2/BNT162b2/Moderna Bivalent     | 25                                  | No                  | 37  | Female |
| UM-47                 | BNT162b2/BNT162b2/BNT162b2/Pfizer Bivalent      | 26                                  | No                  | 45  | Male   |
| UM-48                 | BNT162b2/BNT162b2/mRNA-1273/Moderna Bivalent    | 26                                  | No                  | 43  | Female |
| UM-51                 | mRNA-1273/mRNA-1273/mRNA-1273/Moderna Bivalent  | 29                                  | No                  | 32  | Female |
| UM-52                 | BNT162b2/BNT162b2/BNT162b2/Pfizer Bivalent      | 23                                  | No                  | 43  | Female |
| UM-53                 | BNT162b2/BNT162b2/BNT162b2/Pfizer Bivalent      | 26                                  | No                  | 43  | Female |
| UM-54                 | BNT162b2/BNT162b2/mRNA-1273/Moderna Bivalent    | 29                                  | No                  | 38  | Female |
| UM-55                 | BNT162b2/BNT162b2/BNT162b2/Moderna Bivalent     | 28                                  | No                  | 38  | Female |
| UM-56                 | BNT162b2/BNT162b2/mRNA-1273/Moderna Bivalent    | 27                                  | No                  | 36  | Female |
| UM-60                 | BNT162b2/BNT162b2/BNT162b2/Moderna Bivalent     | 30                                  | No                  | 24  | Female |
| Q101                  | mRNA-1273/mRNA-1273/mRNA-1273/Moderna Bivalent  | 30                                  | No                  | 32  | Female |
| Q102                  | BNT162b2/BNT162b2/mRNA-1273/Moderna Bivalent    | 23                                  | No                  | 39  | Male   |
| Q103                  | BNT162b2/BNT162b2/BNT162b2/Pfizer Bivalent      | 30                                  | No                  | 26  | Female |
| Q104                  | mRNA-1273/mRNA-1273/mRNA-1273/Pfizer Bivalent   | 30                                  | No                  | 27  | Female |
| Q105                  | BNT162b2/BNT162b2/BNT162b2/Pfizer Bivalent      | 23                                  | No                  | 23  | Male   |
| BA.2 breakthrough     |                                                 |                                     |                     |     |        |
| Q35                   | BNT162b2/BNT162b2/BA.2                          | *14                                 | Yes                 | 50  | Female |
| Q36                   | BNT162b2/BNT162b2/BNT162b2/Ad26_COV2.S/BA.2     | *22                                 | Yes                 | 69  | Male   |
| Q49                   | BNT162b2/BNT162b2/mRNA-1273/BA.2                | *16                                 | Yes                 | 32  | Male   |
| Q50                   | mRNA-1273/mRNA-1273/mRNA-1273/BA.2              | *14                                 | Yes                 | 34  | Male   |
| Q51                   | BNT162b2/BNT162b2/mRNA-1273/BA.2                | *19                                 | Yes                 | 33  | Female |
| Q52                   | BNT162b2/BNT162b2/mRNA-1273/BA.2                | *18                                 | Yes                 | 29  | Female |
| Q98                   | BNT162b2/BNT162b2/BA.2                          | *122                                | Yes                 | 22  | Male   |
| Q99                   | mRNA-1273/mRNA-1273/BA.2                        | *164                                | Yes                 | 30  | Female |
| Q100                  | BNT162b2/BNT162b2/BA.2                          | *94                                 | Yes                 | 30  | Female |
| A7                    | BNT162b2/BNT162b2/mRNA-1273/BA.2                | *30                                 | Yes                 | 59  | Female |
| A9                    | BNT162b2/BNT162b2/BNT162b2/BA.2                 | *29                                 | Yes                 | 39  | Female |
| A11                   | BNT162b2/BNT162b2/BNT162b2/BA.2                 | *18                                 | Yes                 | 45  | Female |
| A12                   | BNT162b2/BNT162b2/BNT162b2/BNT162b2/BA.2        | *31                                 | Yes                 | 59  | Female |
| A13                   | BNT162b2/BNT162b2/BNT162b2/BNT162b2/BA.2        | *25                                 | Yes                 | 39  | Male   |
| BA.4/5 breakthrough   |                                                 |                                     |                     |     |        |
| Q71                   | mRNA-1273/mRNA-1273/BNT162b2/BA.5.2.1           | *29                                 | Yes                 | 29  | Female |
| Q77                   | BNT162b2/BNT162b2/BNT162b2/BA.5                 | *22                                 | Yes                 | 61  | Female |
| Q79                   | mRNA-1273/mRNA-1273/mRNA-1273/BA.5              | *15                                 | Yes                 | 28  | Female |
| Q80                   | mRNA-1273/mRNA-1273/mRNA-1273/BA.5              | *21                                 | Yes                 | 24  | Female |
| Q81                   | BNT162b2/BNT162b2/BNT162b2/BA.5                 | *75                                 | Yes                 | 35  | Female |
| Q82                   | BNT162b2/BNT162b2/mRNA-1273/BA.5                | *63                                 | Yes                 | 46  | Female |
| Q83                   | BNT162b2/BNT162b2/BNT162b2/BA.5                 | *28                                 | Yes                 | 55  | Male   |
| Q84                   | BNT162b2/BNT162b2/BNT162b2/BA.5                 | *17                                 | Yes                 | 57  | Female |
| UM-85                 | BNT162b2/BNT162b2/BNT162b2/BA.5                 | *29                                 | Yes                 | 44  | Female |
| UM-86                 | BNT162b2/BNT162b2/mRNA-1273/BA.5                | *29                                 | Yes                 | 36  | Female |
| UM-87                 | BNT162b2/BNT162b2/BNT162b2/BNT162b2/BA.5        | *31                                 | Yes                 | 54  | Female |
| UM-88                 | BNT162b2/BNT162b2/BNT162b2/BNT162b2/BA.5        | *28                                 | Yes                 | 69  | Male   |
| UM-89                 | BNT162b2/BNT162b2/BNT162b2/BNT162b2/BA.5        | *42                                 | Yes                 | 44  | Male   |
| UM-90                 | BNT162b2/BNT162b2/BNT162b2/BNT162b2/BA.5        | *28                                 | Yes                 | 41  | Female |
| UM-91                 | BNT162b2/BNT162b2/BNT162b2/BNT162b2/BA.5        | *28                                 | Yes                 | 44  | Female |
| UM-92                 | BNT162b2/BNT162b2/BNT162b2/BNT162b2/BA.5        | *31                                 | Yes                 | 29  | Female |
| UM-93                 | BNT162b2/BNT162b2/BNT162b2/BNT162b2/BA.5        | *29                                 | Yes                 | 48  | Female |
| UM-94                 | BNT162b2/BNT162b2/BNT162b2/BNT162b2/BA.5        | *29                                 | Yes                 | 49  | Female |
| UM-95                 | BNT162b2/BNT162b2/mRNA-1273/BNT162b2/BA.5       | *28                                 | Yes                 | 37  | Female |
| UM-96                 | BNT162b2/BNT162b2/BNT162b2/BNT162b2/BA.5        | *33                                 | Yes                 | 58  | Female |
